# Supplementary material for: BMP-2 delivery strategy modulates local bone regeneration and systemic immune responses to complex extremity trauma
Source: Royal Society of Chemistry journal article supplement (doi:10.1039/d0bm01728k), 2020-12-30
Supplement: d0bm01728k1.pdf [file d0bm01728k1.pdf]

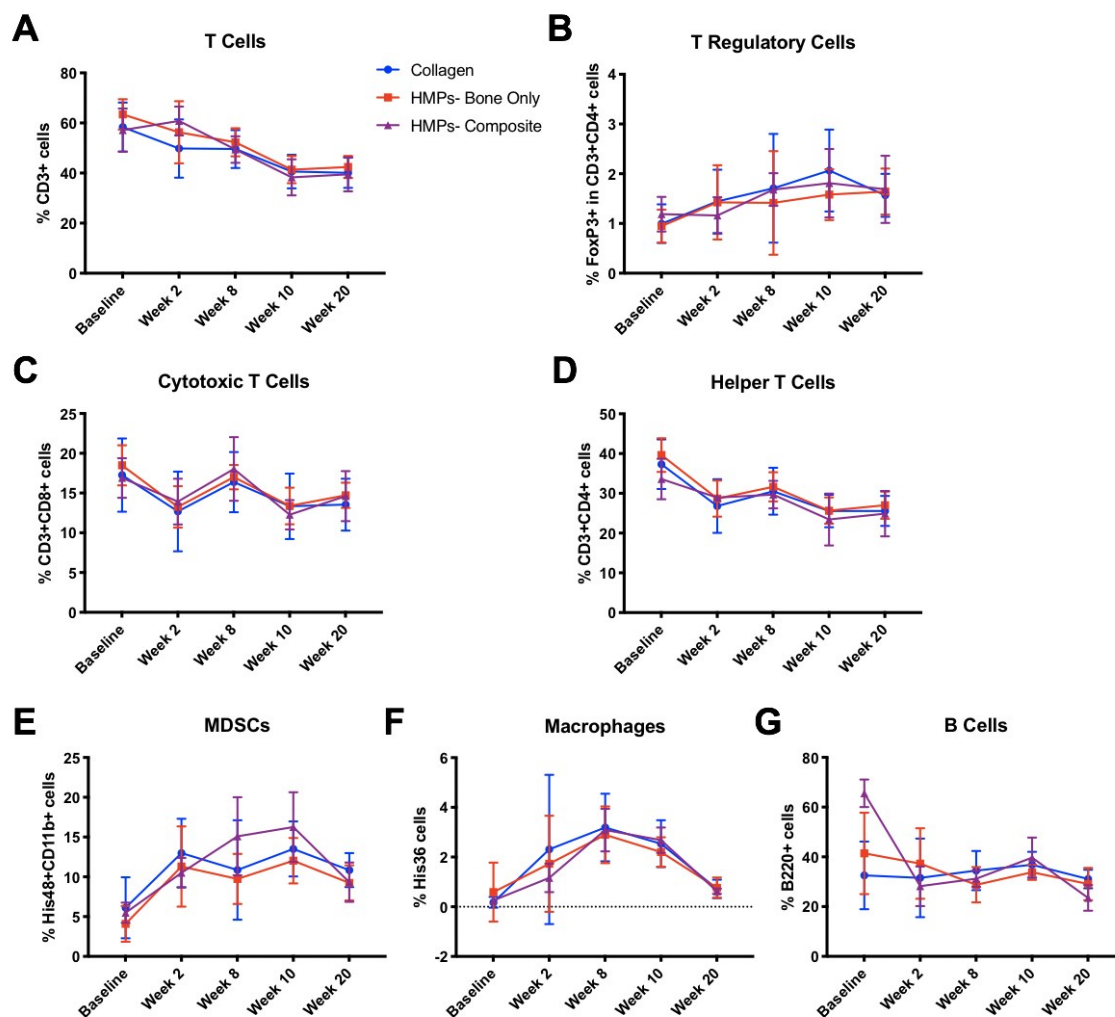

**Supplementary Figure 1.** Longitudinal evaluation of circulating immune cell populations. No significant differences between groups were observed at any time point for A) T cells and T cell subsets, including B) T regulatory cells (Tregs), C) cytotoxic T cells, and D) helper T cells. Additionally, no differences in cell populations levels were observed for E) myeloid-derived suppressor cells (MDSCs), F) macrophages, and G) B cells.

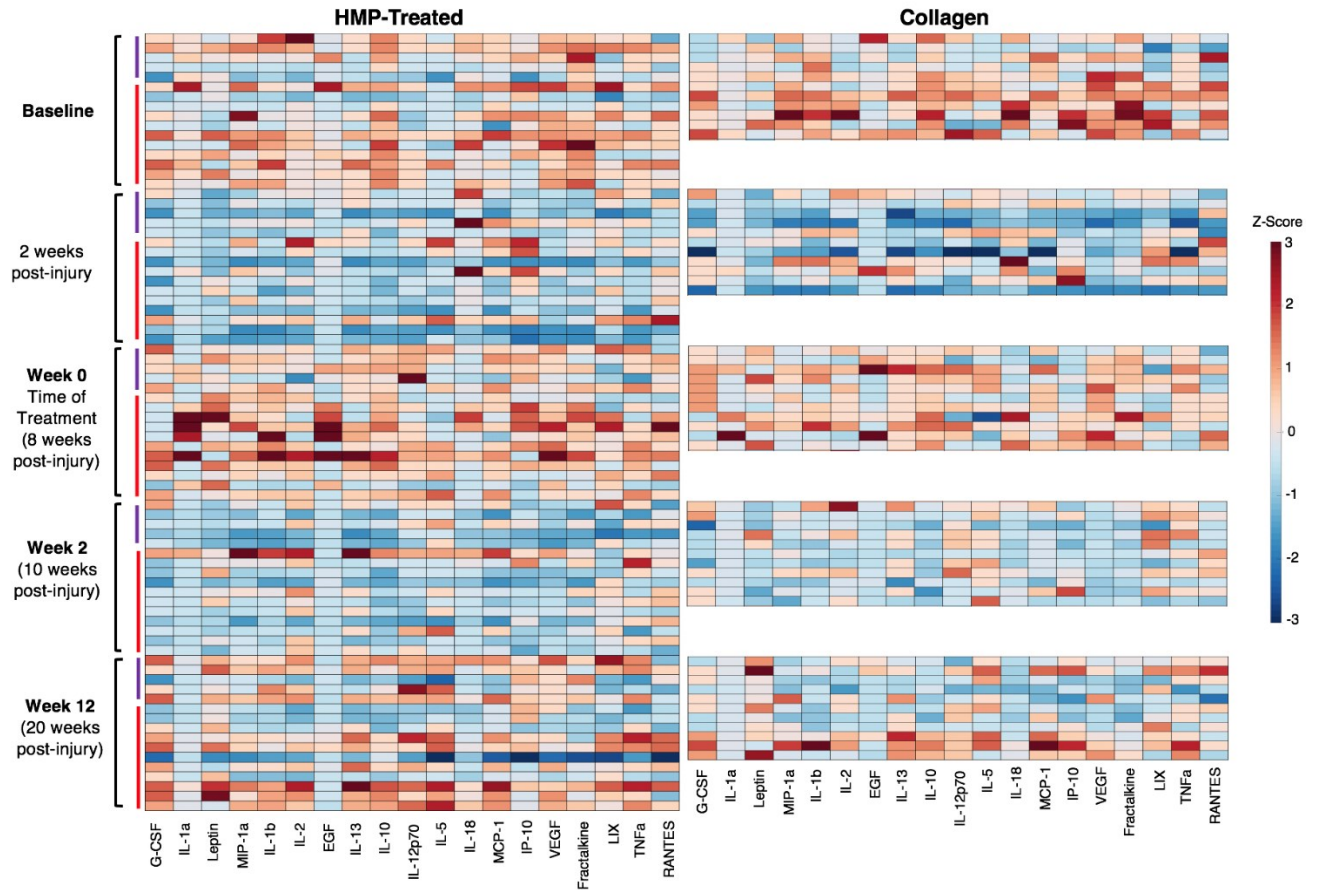

**Supplementary Figure 2.** *Longitudinal evaluation of circulating cytokine levels.* Heat map of z-scored cytokine levels (each column represents a different cytokine) in the HMP-treated and collagen treated groups prior to injury (Baseline) and at 2 weeks post-treatment, Week 0 (time of treatment, 8 weeks post-injury), Week 2 (10 weeks post-injury), and Week 12 (20 weeks post-injury). Purple and red vertical bars represent the HMP-treated composite injury group (n = 5) and the HMP-treated bone only injury group (n = 11), respectively.
